# Supplementary material for: Large-Scale Collection and Analysis of Full-Length cDNAs from Brachypodium distachyon and Integration with Pooideae Sequence Resources
Source: PLOS journal article supplement (doi:10.1371/journal.pone.0075265), 2013-10-09
Supplement: S8 (10.1371/journal.pone.0075265.s008) [file journal.pone.0075265.s008]

Supporting Information TableS2. Gene models in each combination of updated structural features.

| 5'UTR     | CDS          | 3'UTR     | Phytozome 8.0 | MIPS1.2 |
|-----------|--------------|-----------|---------------|---------|
| Extention | Modification | Extention | 32            | 29      |
| Extention | Modification | Addition  | 2             | 4       |
| Extention | Modification | Others    | 31            | 34      |
| Extention | Modification |           | 45            | 46      |
| Addition  | Modification | Extention | 98            | 97      |
| Addition  | Modification | Addition  | 106           | 106     |
| Addition  | Modification | Others    | 30            | 28      |
| Addition  | Modification |           | 245           | 244     |
| Others    | Modification | Extention | 16            | 15      |
| Others    | Modification | Addition  | 2             | 2       |
| Others    | Modification | Others    | 23            | 19      |
| Others    | Modification |           | 31            | 35      |
|           | Modification | Extention | 18            | 18      |
|           | Modification | Addition  | 13            | 13      |
|           | Modification | Others    | 7             | 8       |
|           | Modification |           | 20            | 19      |
| Extention |              | Extention | 324           | 321     |
| Extention |              | Addition  | 38            | 37      |
| Extention |              | Others    | 23            | 22      |
| Extention |              |           | 1,543         | 1,528   |
| Addition  |              | Extention | 431           | 419     |
| Addition  |              | Addition  | 569           | 569     |
| Addition  |              | Others    | 14            | 12      |
| Addition  |              |           | 1,729         | 1,720   |
| Others    |              | Extention | 8             | 13      |
| Others    |              | Others    | 37            | 23      |
| Others    |              |           | 22            | 17      |
|           |              | Extention | 544           | 539     |
|           |              | Addition  | 235           | 236     |
|           |              | Others    | 5             | 7       |
|           | Modified     |           | 6,241         | 6,180   |
|           | Not modified |           | 24,768        | 24,829  |
|           | Total        |           | 31,009        | 31,009  |
